# Supplementary material
Source: HighWire-hosted journal article supplement (https://www.annals.org/content/suppl/2007/02/28/146.5.365)
Supplement: Dube_A1_146-5-365-DC1-A1.pdf [file Dube_A1_146-5-365-DC1-A1.pdf]

**Appendix Table 1. Confounders Controlled for in the Studies' Adjusted Relative Risk Estimates for the Incidence of Colorectal Cancer (Cohort and Case-Control Studies)\***

| Study, Year (Reference)                                                                                                      | Source of Abstracted Data | Methods for Selection of Confounders          | Confounders                                                                                                                                                             | Individual Study Estimate RR (95% CI) | Index of Heterogeneity and Pooled Estimate RR (95% CI) |
|------------------------------------------------------------------------------------------------------------------------------|---------------------------|-----------------------------------------------|-------------------------------------------------------------------------------------------------------------------------------------------------------------------------|---------------------------------------|--------------------------------------------------------|
| <b>Cohort studies:<br/>duration of aspirin use (7–9 y) and risk for CRC</b>                                                  |                           |                                               |                                                                                                                                                                         |                                       |                                                        |
| Friis et al., 2003 (29)                                                                                                      | Table 3 (p. 687)          | A priori†                                     | Age, sex (women and men)                                                                                                                                                | 0.90 (0.70–1.10)                      | $I^2 = 0$<br>RR = 0.91 (0.76–1.10)                     |
| Giovannucci et al., 1995 (54)                                                                                                | Table 2 (p. 612)          | A priori‡                                     | Age, sex (women)                                                                                                                                                        | 0.84 (0.55–1.28)                      |                                                        |
| Stürmer et al., 1998 (25)                                                                                                    | Table 4                   | Stepwise model-based selection                | Age, sex (men), BMI, smoking, alcohol consumption                                                                                                                       | 1.07 (0.67–1.70)                      |                                                        |
| <b>Cohort studies:<br/>regular aspirin use (<math>\geq 2</math>–3 d per week for <math>\geq 1</math> y) and risk for CRC</b> |                           |                                               |                                                                                                                                                                         |                                       |                                                        |
| Stürmer et al., 1998 (25)                                                                                                    | Table 4                   | Stepwise model-based selection                | Age, sex (men), BMI, smoking, alcohol consumption                                                                                                                       | 1.07 (0.67–1.70)                      | $I^2 = 49$<br>RR = 0.78 (0.63–0.97)                    |
| Giovannucci et al., 1994 (26)                                                                                                | Table 2 (p. 243)          | A priori§                                     | Age; sex (men); family history of CRC; pack-years of smoking; BMI; physical activity levels; alcohol consumption; dietary intake of fat, meat, calcium, and vitamin D   | 0.54 (0.34–0.83)                      |                                                        |
| Giovannucci et al., 1995 (54)                                                                                                | Table 1 (p. 611)          | A priori§                                     | Age; sex (women); family history of CRC; pack-years of smoking; BMI; physical activity levels; alcohol consumption; dietary intake of fat, meat, calcium, and vitamin D | 0.62 (0.44–0.86)                      |                                                        |
| Friis et al., 2003 (29)                                                                                                      | Table 3 (p. 687)          | A priori†                                     | Age, sex (women and men)                                                                                                                                                | 0.90 (0.70–1.10)                      |                                                        |
| Schreinemachers and Everson, 1994 (27)                                                                                       |                           | A priori§                                     | Age, sex (women and men)                                                                                                                                                | 0.85 (0.63–1.15)                      |                                                        |
| <b>Case-control studies:<br/>duration of aspirin use (1–3 y) and risk for CRC</b>                                            |                           |                                               |                                                                                                                                                                         |                                       |                                                        |
| La Vecchia et al., 1997 (18)                                                                                                 | Table 2 (p. 676)          | Stepwise model-based selection                | Age, sex (women and men), center, education, BMI, alcohol consumption, physical activity, total energy, and meat intake                                                 | 0.90 (0.50–1.70)                      | $I^2 = 0$<br>RR = 0.85 (0.72–1.00)                     |
| Friedman et al., 1998 (56)                                                                                                   | Table 2 (p. 101)          | A priori and stepwise model-based selection   | Age; sex (women and men); use of NSAIDs; alcohol consumption; family history of CRC; BMI; physical activity; smoking; total energy; fiber, calcium, and meat intake     | 0.80 (0.60–1.00)                      |                                                        |
| Rosenberg et al., 1998 (55)                                                                                                  | Table 4 (p. 2331)         | Stepwise model-based selection                | Age, sex (men and women)                                                                                                                                                | 1.00 (0.60–1.70)                      |                                                        |
| García-Rodríguez and Huerta-Alvarez, 2001 (17)                                                                               | Table 6 (p. 92)           | A priori and stepwise model-based selection   | Age, sex (men and women)                                                                                                                                                | 0.90 (0.70–1.20)                      |                                                        |
| Slatterly et al., 2004 (24)                                                                                                  | Table 2 (p. 216)          | A priori and stepwise model-based selection ¶ | Age, sex (men and women), alcohol consumption, family history of CRC, BMI, smoking, education, dietary fiber intake                                                     | 0.54 (0.24–1.23)                      |                                                        |

*Appendix Table 1—Continued*

| Study, Year (Reference)                                                            | Source of Abstracted Data | Methods for Selection of Confounders        | Confounders                                                                                                                                                         | Individual Study Estimate RR (95% CI) | Index of Heterogeneity and Pooled Estimate RR (95% CI) |
|------------------------------------------------------------------------------------|---------------------------|---------------------------------------------|---------------------------------------------------------------------------------------------------------------------------------------------------------------------|---------------------------------------|--------------------------------------------------------|
| <b>Case-control studies:<br/>duration of aspirin use (4–6 y) and risk for CRC</b>  |                           |                                             |                                                                                                                                                                     |                                       |                                                        |
| La Vecchia et al., 1997 (18)                                                       | Table 2 (p. 676)          | Stepwise model-based selection              | Age, sex (women and men), center, education, BMI, alcohol consumption, physical activity, total energy, and meat intake                                             | 0.60 (0.40–1.00)                      |                                                        |
| Friedman et al., 1998 (56)                                                         | Table 2 (p. 101)          | A priori and stepwise model-based selection | Age; sex (women and men); use of NSAIDs; alcohol consumption; family history of CRC; BMI; physical activity; smoking; total energy; fiber, calcium, and meat intake | 0.80 (0.60–0.90)                      |                                                        |
| Rosenberg et al., 1998 (55)                                                        | Table 4 (p. 2331)         | Stepwise model-based selection              | Age, sex (men and women)                                                                                                                                            | 0.50 (0.30–0.70)                      |                                                        |
| García-Rodríguez and Huerta-Alvarez, 2001 (17)                                     | Table 6 (p. 92)           | A priori and stepwise model-based selection | Age, sex (men and women)                                                                                                                                            | 0.90 (0.70–1.20)                      |                                                        |
|                                                                                    |                           |                                             |                                                                                                                                                                     |                                       | $I^2 = 39$<br>RR = 0.74 (0.60–0.90)                    |
| <b>Case-control studies:<br/>recency (&gt;1 y) of aspirin use and risk for CRC</b> |                           |                                             |                                                                                                                                                                     |                                       |                                                        |
| Friedman et al., 1998 (56)                                                         | Table 2 (p. 101)          | A priori and stepwise model-based selection | Age; sex (women and men); use of NSAIDs; alcohol consumption; family history of CRC; BMI; smoking; physical activity; total energy; fiber, calcium, and meat intake | 1.00 (0.80–1.20)                      |                                                        |
| La Vecchia et al., 1997 (18)                                                       | Table 2 (p. 676)          | Stepwise model-based selection              | Age, sex (women and men), center, education, BMI, alcohol consumption, physical activity, total energy, and meat intake                                             | 0.90 (0.50–1.60)                      |                                                        |
| García-Rodríguez and Huerta-Alvarez, 2001 (17)                                     | Table 6 (p. 92)           | A priori and stepwise model-based selection | Age, sex (men and women)                                                                                                                                            | 1.00 (0.70–1.30)                      |                                                        |
|                                                                                    |                           |                                             |                                                                                                                                                                     |                                       | $I^2 = 0$<br>RR = 0.99 (0.84–1.17)                     |

\* BMI = body mass index; CRC = colorectal cancer; NSAIDs = nonsteroidal anti-inflammatory drugs; RR = relative risk.

† The authors calculated standardized incidence ratio, which incorporates age- and sex-specific cancer rates in population.

‡ Cox proportional-hazards modeling (adjusted for age).

§ Cox proportional-hazards modeling (adjusted for potential confounders).

|| Poisson regression modelling.

¶ Unconditional logistic regression model.
