# Supplementary material
Source: HighWire-hosted journal article supplement (https://www.annals.org/content/suppl/2007/02/28/146.5.365)
Supplement: Dube_A2_146-5-365-DC1-A2.pdf [file Dube_A2_146-5-365-DC1-A2.pdf]

**Appendix Table 2. Confounders Controlled for in the Studies' Adjusted Relative Risk Estimates for the Incidence of Colorectal Adenoma (Cohort and Case–Control Studies)\***

| Study, Year (Reference)                                                            | Source of Abstracted Data | Methods for Selection of Confounders         | Confounders                                                                                                                                                                             | Individual Study Estimate RR (95% CI) | Index of Heterogeneity and Pooled Estimate RR (95% CI) |
|------------------------------------------------------------------------------------|---------------------------|----------------------------------------------|-----------------------------------------------------------------------------------------------------------------------------------------------------------------------------------------|---------------------------------------|--------------------------------------------------------|
| <b>Cohort studies:</b>                                                             |                           |                                              |                                                                                                                                                                                         |                                       |                                                        |
| regular aspirin use ( $\geq 2$ –3 d per week for $\geq 1$ y) and risk for adenomas |                           |                                              |                                                                                                                                                                                         |                                       |                                                        |
| Giovannucci et al., 1994 (26)                                                      | Table 4 (p. 244)          | A priori                                     | Age; sex (men); family history of CRC; pack-years of smoking; BMI; physical activity levels; dietary intake of fat, meat, calcium, alcohol, and vitamin D                               | 0.65 (0.42–1.02)                      |                                                        |
| Chan et al., 2004 (39)                                                             | Table 3 (p. 161)          | A priori and stepwise model-based selection† | Age; sex (women); pack-years of smoking; BMI; physical activity levels; history of CRC in sibling or parent; alcohol intake; postmenopausal HRT; meat, calcium, and vitamin intake      | 0.73 (0.61–0.87)                      |                                                        |
|                                                                                    |                           |                                              |                                                                                                                                                                                         |                                       | $I^2 = 0$<br>RR = 0.72 (0.61–0.85)                     |
| <b>Case–control studies:</b>                                                       |                           |                                              |                                                                                                                                                                                         |                                       |                                                        |
| regular aspirin use and risk for adenomas                                          |                           |                                              |                                                                                                                                                                                         |                                       |                                                        |
| Morimoto et al., 2002 (34)                                                         | Table 3 (p.1016)          | Backwards stepwise model-based selection†    | Age, sex, BMI, HRT, pack-years of smoking, alcohol consumption                                                                                                                          | 0.70 (0.50–1.10)                      |                                                        |
| Kahn et al., 1998 (37)                                                             | Table 3 (p. 307)          | Stepwise model-based selection†              | Age; education; race; gallbladder status; BMI; exercise; smoking; alcohol and coffee consumption; multivitamin use; family history of CRC; dietary intake of eggs, vegetables, and meat | 0.97 (0.89–1.06)<br>Sample of men     |                                                        |
| Kahn et al., 1998 (37)                                                             | Table 3 (p. 307)          | Stepwise model-based selection†              | Same as in men, plus parity, HRT, and menopausal status                                                                                                                                 | 0.85 (0.77–0.95)<br>Sample of women   |                                                        |
| Suh et al., 1993 (19)                                                              | Table 2 (p. 1174)         | A priori and stepwise model-based selection† | Age, sex, residence, and level of education                                                                                                                                             | 0.61 (0.26–1.40)                      |                                                        |
| García-Rodríguez and Huerta-Alvarez, 2000 (35)                                     | Table 5 (p. 380)          | Stepwise model-based selection†              | Age, sex, ischemic heart disease, constipation                                                                                                                                          | 0.90 (0.60–1.30)                      |                                                        |
| Logan et al., 1993 (33)                                                            | Table 2 (p. 286)          | A priori and stepwise model-based selection† | Age- and sex-matched case-patients and controls                                                                                                                                         | 0.55 (0.30–1.10)                      |                                                        |
|                                                                                    |                           |                                              |                                                                                                                                                                                         |                                       | $I^2 = 41$<br>RR = 0.97 (0.77–0.98)                    |

\* BMI = body mass index; CRC = colorectal cancer; HRT = hormone replacement therapy; RR = relative risk.

† Multiple logistic regression model.
