# Supplementary material
Source: HighWire-hosted journal article supplement (https://www.annals.org/content/suppl/2007/02/28/146.5.365)
Supplement: Dube_A3_146-5-365-DC1-A3.pdf [file Dube_A3_146-5-365-DC1-A3.pdf]

**Appendix Table 3. Included Studies: Aspirin Chemoprevention of Colonic Adenomas and Colorectal Cancer, by Study Design\***

**Colorectal Cancer—Case–Control Studies (n = 7)**

| Study, Year, Location (Reference)         | Participants Enrolled/ Completed Study, n/n | Duration  | Case-Patients                                                                                                                                                                                    | Controls                                                                                                                                                                                                                    | Exposure (Ascertainment)                                   | Quality Rating |
|-------------------------------------------|---------------------------------------------|-----------|--------------------------------------------------------------------------------------------------------------------------------------------------------------------------------------------------|-----------------------------------------------------------------------------------------------------------------------------------------------------------------------------------------------------------------------------|------------------------------------------------------------|----------------|
| García Rodríguez et al., 2001, Spain (17) | 12 005/12 002                               | 3 y       | Persons age 40–79 y with biopsy-proven CRC from the General Practice Research Database (n = 2002)                                                                                                | Randomly selected persons age 40–79 y free of CRC at the index date of case (n = 10 000), frequency-matched by sex and age to case-patients                                                                                 | Nonaspirin NSAIDs and aspirin (prescription drug database) | Good           |
| La Vecchia et al., 1997, Italy (18)       | 3248/3248                                   | 4.5 y     | Patients with histologically confirmed CRC (n = 860 colon; n = 497 rectum)                                                                                                                       | Patients in same residing area/hospital as case-patients, identified for acute conditions unrelated to known or likely risk factors for CRC (n = 1891)                                                                      | Aspirin (questionnaire)                                    | Fair           |
| Suh et al., 1993, U.S. (19)               | 2704/NR                                     | 9 y       | Case-patients 1: first primary colon cancer (n = 490)<br>Case-patients 2: first primary rectal cancer (n = 340)                                                                                  | Controls 1: Healthy persons at preventive health visit (n = 1138)<br>Controls 2: healthy persons without cancer (n = 524)                                                                                                   | Aspirin (questionnaire)                                    | Fair           |
| Kune et al., 1988, Australia (20)         | 1442/1367                                   | 1 y       | Persons with newly diagnosed CRC between April 1980 and April 1981 (n = 715)                                                                                                                     | Randomly selected patients matched for age, sex, and geographic area                                                                                                                                                        | Aspirin, NSAID (questionnaire)                             | Fair           |
| Juarranz et al., 2002, Spain (21)         | 502/424                                     | NR        | Patients with biopsy-proven colon cancer between January 1995 and December 1996, residing in Madrid (n = 196)                                                                                    | Persons free of neoplasm or severe digestive disease (Crohn disease or ulcerative colitis) at enrollment, randomly chosen from electoral lists from same area as case-patients and matched to case-patients for age and sex | Aspirin and NSAIDs (questionnaire)                         | Fair           |
| Reeves et al., 1996, U.S. (23)            | 845/400                                     | 1 y       | Women age 40–74 y, local residents with new diagnosis of invasive cancer of the colon or rectum, with listed telephone number (n = 184)                                                          | Persons with listed telephone number and either a current Wisconsin driver's license (age <65 y) or a Medicare card (age >65 y) (n = 293)                                                                                   | Aspirin, NSAID, (questionnaire)                            | Fair           |
| Slattery et al., 2004, U.S. (24)          | 3051/2157                                   | 5 y, 2 mo | English-speaking persons mentally competent to complete the interview, age 30–79 y; first primary tumor in the rectosigmoid junction or rectum diagnosed between May 1997 and May 2001 (n = 952) | Patients matched by sex and 5-y age group; those > age 65 y randomly selected from Health Care Financing Administration lists; those < age 65 y selected from driver's license lists (n = 1205)                             | Aspirin, NSAID (questionnaire)                             | Fair           |

**Colorectal Cancer—Cohort Studies (n = 7)**

| Study, Year, Location (Reference) | Participants Enrolled/ Completed Study, n/n | Study Duration | Population                                                                                                                                | Cohort Name          | Exposure                                                                                                                                      | Quality Rating |
|-----------------------------------|---------------------------------------------|----------------|-------------------------------------------------------------------------------------------------------------------------------------------|----------------------|-----------------------------------------------------------------------------------------------------------------------------------------------|----------------|
| Chan et al., 2005, U.S. (30)      | 89 446/82 911                               | 20 y           | Inclusion criteria: female registered nurses age 30–55 y (in 1976)<br>Exclusion criteria: baseline cancer, did not fill out questionnaire | Nurses' Health Study | Aspirin<br>Nonaspirin NSAIDs<br>Assessed tablets/ week (1–3, 4–6, 7–14, >14);<br>number of days/month of use; frequency per week; regular use | Good           |

*Continued on following page*

Appendix Table 3—Continued

|                                         |                   |      |                                                                                                                                                                                                                                                                                                                                     |                                      |                                                                                                                                                                                                                                                                                                                                                                                             |      |
|-----------------------------------------|-------------------|------|-------------------------------------------------------------------------------------------------------------------------------------------------------------------------------------------------------------------------------------------------------------------------------------------------------------------------------------|--------------------------------------|---------------------------------------------------------------------------------------------------------------------------------------------------------------------------------------------------------------------------------------------------------------------------------------------------------------------------------------------------------------------------------------------|------|
| Giovannucci et al., 1994, U.S. (26)     | 47 900/45 505     | 7 y  | Inclusion criteria: Male health professionals; respondents to mailed questionnaire in 1986; age 40–75 y<br>Exclusion criteria: NR                                                                                                                                                                                                   | Health Professionals Follow-up Study | Aspirin: in all 3 questionnaires ( $n = 11\,260$ person-years) in CRC study<br>Nonexposed: $n = 30\,020$ person-years in CRC study                                                                                                                                                                                                                                                          | Good |
| Schreinemachers et al., 1994, U.S. (27) | 14 407/12 668     | 16 y | Inclusion criteria: Patients with medical examination and age 25–74 y at time of NHANES I<br>Exclusion criteria: Case-patients: diagnosis occurring $\geq 2$ y of NHANES I; controls: incomplete surveys or data on aspirin use                                                                                                     | NHANES/NHEFS                         | Aspirin: within 30 d of baseline interview ( $n = 7438$ );<br>Nonexposed: within 30 d of baseline interview ( $n = 5250$ )                                                                                                                                                                                                                                                                  | Fair |
| Thun et al., 1991, U.S. (28)            | 1 083 531/662 424 | 6 y  | Inclusion criteria: White adults (friends/family of volunteers for Cancer Prevention Study II in 1982) who provided information in 1982 on the frequency and duration of aspirin use<br>Exclusion criteria: Nonwhite (due to small number of deaths in this group); aspirin use $< 1$ y                                             | Cancer Prevention Study II           | Aspirin: $< 1$ time/mo ( $n = 486\,620$ person-years for men and $n = 671\,927$ person-years for women); 1–15 times/mo (389 083 person-years for men and 505 854 person-years for women); $\geq 16$ times/mo ( $n = 201\,638$ person-years for men and $n = 265\,424$ person-years for women);<br>Nonexposed: $n = 646\,346$ person-years for men and $n = 705\,064$ person-years for women | Fair |
| Friis et al., 2003, Denmark (29)        | 29 470/29 470     | 9 y  | Inclusion criteria: Patients with prescribed low-dose aspirin (maximum dose, 150 mg), Danish Cancer registry, controlled for age, sex, and county<br>Exclusion criteria: Residency outside county of North Jutland; invalid civil registry number; death before/at date of prescription; parent (of patient) registered as customer | North Jutland cohort database        | Low-dose aspirin (follow-up: 6 y): $n = 29\,470$                                                                                                                                                                                                                                                                                                                                            | Fair |

Appendix Table 3—Continued

|                                 |               |                                               |                                                                                                                                                                                                                                                                                               |                          |                                                                                                                                                                                                |      |
|---------------------------------|---------------|-----------------------------------------------|-----------------------------------------------------------------------------------------------------------------------------------------------------------------------------------------------------------------------------------------------------------------------------------------------|--------------------------|------------------------------------------------------------------------------------------------------------------------------------------------------------------------------------------------|------|
| Paganini-Hill, 1995, U.S. (15)  | 13 979/12 180 | 11 y                                          | Inclusion criteria: Community residents with returned questionnaire on medical history; use of drugs, laxatives, and supplements; smoking; alcohol consumption; exercise habits; health care utilization; and, for women, menstrual history (i.e., use of estrogen)<br>Exclusion criteria: NR | Leisure World Cohort     | Aspirin: Less than daily or daily                                                                                                                                                              | Poor |
| Stürmer et al., 1998, U.S. (25) | 22 071/22 071 | 12 y (RCT, first 5 y; cohort study, next 7 y) | Inclusion criteria: U.S. male physicians, age 40–84 y in 1982<br>Exclusion criteria: Regular use of aspirin or other NSAIDs; history of myocardial infarction, stroke, cancer, liver or renal disease, gout, peptic ulcer, or contraindications to aspirin                                    | Physicians' Health Study | Randomly assigned to aspirin/regular aspirin use thereafter ( <i>n</i> = 41 869 person-years); randomly assigned to placebo/irregular aspirin use thereafter ( <i>n</i> = 18 342 person-years) | Poor |

Colorectal Cancer—RCTs (*n* = 2)

| Study, Year, Location (Reference) | Participants Enrolled/ Completed Study, <i>n/n</i> | Study Duration | Population                                                                                                                                                                                                                                     | Control Group | Exposure(s)                     | Quality Rating |
|-----------------------------------|----------------------------------------------------|----------------|------------------------------------------------------------------------------------------------------------------------------------------------------------------------------------------------------------------------------------------------|---------------|---------------------------------|----------------|
| Gann et al., 1993, U.S. (31)      | 22 071/NR                                          | 6 y            | Inclusion criteria: U.S. male physicians, age 40–84 y<br>Exclusion criteria: History of CVD, cancer, liver or renal disease, gout, peptic ulcer, contraindications to aspirin, or current use of NSAIDs or vitamin A                           | Placebo       | Aspirin                         | Fair           |
| Cook et al., 2005, U.S. (32)      | 39 876 (39 876/39 876)                             | 10 y           | Inclusion criteria: U.S. female health care workers age >45 y, no history of cancer, CVD, or other major disease<br>Exclusion criteria: Sensitivity to aspirin; aspirin use >1 time/wk; use of oral anticoagulants, vitamin A or E supplements | Placebo       | Aspirin, 100 mg every other day | Good           |

Appendix Table 3—Continued

Colonic Adenomas—Cohort Studies (*n* = 4)

| Study, Year, Location (Reference)       | Participants Enrolled/ Completed Study, <i>n/n</i> | Study Duration | Population                                                                                                                                                                                                                                                                                                                                            | Cohort Name                          | Exposure                                                                                                                                                                                                                                                                                           | Quality Rating |
|-----------------------------------------|----------------------------------------------------|----------------|-------------------------------------------------------------------------------------------------------------------------------------------------------------------------------------------------------------------------------------------------------------------------------------------------------------------------------------------------------|--------------------------------------|----------------------------------------------------------------------------------------------------------------------------------------------------------------------------------------------------------------------------------------------------------------------------------------------------|----------------|
| Giovannucci et al., 1994, U.S. (26)     | 47 900/45 505                                      | 7 y            | Inclusion criteria: Male health professionals responding to mailed questionnaire in 1986, age 40–75 y<br>Exclusion criteria: NR                                                                                                                                                                                                                       | Health Professionals Follow-up Study | Aspirin: in all 3 questionnaires ( <i>n</i> = 11 260 person-years in CRC study)<br>Aspirin: <i>n</i> = 1242 person-years in 1986 survey only<br>Nonexposed: <i>n</i> = 30 020 person-years in CRC study<br>Nonexposed: <i>n</i> = 2472 person-years in adenoma study                               | Good           |
| Chan et al., 2004, U.S. (30, 39)        | 27 077/27 077                                      | 21 y           | Inclusion criteria: Women (registered U.S. nurses), age 30–55 y, who completed baseline dietary questionnaire and underwent colonoscopy or sigmoidoscopy during study period<br>Exclusion criteria: Incomplete questionnaires; no data/implausible dietary/aspirin data; history of cancer (except nonmelanoma skin cancer), CRA, IBD, or FAP         | Nurses' Health Study                 | Aspirin: 0.5–1.5 tablets/wk: <i>n</i> = 6340;<br>2–5 tablets/wk: <i>n</i> = 4172;<br>6–14 tablets/wk: <i>n</i> = 4352; >14 tablets/wk: <i>n</i> = 1634<br>Nonexposed: <i>n</i> = 10 579                                                                                                            | Good           |
| Polyp Prevention Study, 2003, U.S. (41) | NR/1905                                            | 4 y            | Inclusion criteria: Enrollees of the Polyp Prevention Trial, 1991, ≥ age 35 y with ≥1 histologically confirmed colorectal adenoma identified by complete colonoscopy within 6 mo before randomization<br>Exclusion criteria: History of colorectal cancer, surgical resection of adenomas, IBD, or FAP                                                | Polyp Prevention Study               | Aspirin: any use ( <i>n</i> = 431); up to 325 mg/d ( <i>n</i> = 369); >325 mg/d ( <i>n</i> = 62); unexposed ( <i>n</i> = 1474); NSAID: any use ( <i>n</i> = 629); unexposed ( <i>n</i> = 1276); use reported at all 5 visits ( <i>n</i> = 253); no use reported at all 5 visits ( <i>n</i> = 1462) | Good           |
| Greenberg et al., 1993, U.S. (40)       | 864/793                                            | ~4 y           | Inclusion criteria: Patients with ≥1 histologically confirmed adenoma removed within 3 mo before study entry, free of further polyps, age <80 y, otherwise healthy<br>Exclusion criteria: Invasive large-bowel cancer; IBD; malabsorption; or any contraindication to β-carotene, vitamin C, vitamin E (history of kidney stones or thrombophlebitis) | Polyp Prevention Study I             | Aspirin: consistent use ( <i>n</i> = 102); Aspirin: intermittent use ( <i>n</i> = 98); Nonexposed: <i>n</i> = 593                                                                                                                                                                                  | Fair           |

## Colonic Adenomas—RCTs (n = 3)

| Study, Year, Location (Reference)    | Participants Enrolled/ Completed Study, n/n | Study Duration | Population                                                                                                                                                                                                                                                                                                                                                                                                                                                                                    | Study Name                                                        | Exposure                                                                                                | Quality Rating |
|--------------------------------------|---------------------------------------------|----------------|-----------------------------------------------------------------------------------------------------------------------------------------------------------------------------------------------------------------------------------------------------------------------------------------------------------------------------------------------------------------------------------------------------------------------------------------------------------------------------------------------|-------------------------------------------------------------------|---------------------------------------------------------------------------------------------------------|----------------|
| Gann et al., 1993, U.S. (31)         | 22 071/NR                                   | 6 y            | Inclusion criteria: U.S. male physicians, age 40–84 y<br>Exclusion criteria: History of CVD, cancer, liver or renal disease, gout, peptic ulcer, contraindications to aspirin, or current use of NSAIDs or vitamin A                                                                                                                                                                                                                                                                          | Physician's Health Study                                          | Aspirin vs. placebo                                                                                     | Fair           |
| Baron et al., 2003, U.S. (42)        | 1121/1084                                   | 7 y            | Inclusion criteria: Healthy patients age 21–80 y; $\geq 1$ histologically confirmed CRA removed within 3 mo, or within 16 mo with history of $\geq 2$ confirmed CRAs, or a histologically confirmed adenoma $\geq 1$ cm in diameter removed within 16 mo; complete colonoscopy within 3 mo with no colorectal polyps remaining<br>Exclusion criteria: History of familial CRC syndrome; invasive large-bowel cancer; malabsorption syndromes; contraindications to aspirin, NSAIDs, or folate | Aspirin/Folate Prevention Study                                   | Aspirin, 81 mg/d, vs. aspirin, 325 mg, vs. placebo                                                      | Good           |
| Benamouzig et al., 2003, France (43) | 272/238                                     | >8 y           | Inclusion criteria: Patients age 18–75 y with $\geq 3$ CRAs of any size or 1 CRA $\geq 6$ mm in diameter; no regular use of aspirin or other NSAIDs (7 consecutive d $> 3$ wk/y or $> 21$ d/y); removed polyps $< 3$ mo after consultation; clean colon/rectum at entry; eligible women: menopausal or using efficient contraception<br>Exclusion criteria: History of CRC, FAP, bowel resection excluding appendectomy, IBD, or debilitating or life-threatening diagnosis                   | Association pour la prévention par l'aspirin du colorectal cancer | Lysine acetylsalicylate, 160 mg/d (n = 73), vs. lysine acetylsalicylate, 300 mg/d (n = 67), vs. placebo | Good           |

*Appendix Table 3—Continued*

**Colonic Adenomas—Case–Control Studies (*n* = 7)**

| <b>Study, Year, Location (Reference)</b>      | <b>Participants Enrolled/ Completed Study, <i>n/n</i></b> | <b>Duration</b> | <b>Case-Patients</b>                                                                                                                             | <b>Controls</b>                                                                                                                                                                                                                                                              | <b>Exposure (Ascertainment)</b>                                                                                          | <b>Quality Rating</b> |
|-----------------------------------------------|-----------------------------------------------------------|-----------------|--------------------------------------------------------------------------------------------------------------------------------------------------|------------------------------------------------------------------------------------------------------------------------------------------------------------------------------------------------------------------------------------------------------------------------------|--------------------------------------------------------------------------------------------------------------------------|-----------------------|
| García Rodríguez et al., 2000, Spain (35)     | 943 903/NR                                                | 5 y, 8 mo       | Adenoma case-patients: adenoma on medical records database with biopsy ( <i>n</i> = 1864); CRC case-patients: incident of CRC ( <i>n</i> = 2002) | Randomly selected age- and sex-matched persons from database; absence of adenoma ( <i>n</i> = 10 000)                                                                                                                                                                        | Nonaspirin NSAIDs, aspirin, ibuprofen, diclofenac, naproxen, indomethacin, piroxicam, ketoprofen (prescription database) | Good                  |
| Morimoto et al., 2002, U.S. (34)              | 1037/1037                                                 | 3 y             | Incident adenomatous polyp ( <i>n</i> = 474)                                                                                                     | Persons negative for CRC on colonoscopy ( <i>n</i> = 563)                                                                                                                                                                                                                    | Aspirin, nonaspirin NSAIDs (questionnaire)                                                                               | Fair                  |
| Logan et al., 1993, United Kingdom (33)       | 476/NR                                                    | 7 y             | Patients with positive results on fecal occult blood tests with CRA ( <i>n</i> = 147)                                                            | Patients matched for age and sex; negative controls—patients with negative results on fecal occult blood test; positive controls—patients with positive results on screening found to be free of adenomas and carcinomas on sigmoidoscopy and barium enema ( <i>n</i> = 153) | Aspirin, NSAIDs, nonaspirin NSAIDs (questionnaire)                                                                       | Fair                  |
| Breuer-Katschinski et al., 2000, Germany (36) | 1265/550                                                  | 3.5 y           | Patients with histologically proven and endoscopically removed adenoma of colon or rectum ( <i>n</i> = 182)                                      | Hospital controls: matched for age and sex, free of adenomatous polyps at colonoscopy ( <i>n</i> = 178)<br>Nonhospital (community) controls: persons of same age and sex as case-patients, selected from inhabitants list of city of Essen ( <i>n</i> = 182)                 | NSAID (questionnaire)                                                                                                    | Fair                  |
| Suh et al., 1993, U.S. (19)                   | 2704/NR                                                   | 9 y             | Case-patients 1: first primary colon cancer ( <i>n</i> = 490)<br>Case-patients 2: first primary rectal cancer ( <i>n</i> = 340)                  | Controls 1: healthy persons at preventive health visit ( <i>n</i> = 1138)<br>Controls 2: healthy persons without cancer ( <i>n</i> = 524)                                                                                                                                    | Aspirin (questionnaire)                                                                                                  | Fair                  |
| Sandler et al., 1998, U.S. (38)               | 492/379                                                   | 3 y             | Patients with incident adenoma ( <i>n</i> = 142)                                                                                                 | Persons free of adenomatous polyps or having hyperplastic polyps ( <i>n</i> = 169)                                                                                                                                                                                           | Aspirin, NSAID, nonaspirin NSAID (questionnaire)                                                                         | Fair                  |
| Kahn et al., 1998, U.S. (37)                  | 177 939/154 224                                           | 10 y            | Patients with self-reported polyps per mailed questionnaire ( <i>n</i> = 7504 men; <i>n</i> = 5111 women)                                        | Persons who did not report polyps ( <i>n</i> = 65 364 men; <i>n</i> = 76 245 women)                                                                                                                                                                                          | Aspirin (questionnaire)                                                                                                  | Poor                  |

\* CRA = colorectal adenoma; CRC = colorectal cancer; CVD = cardiovascular disease; FAP = familial adenomatous polyposis; IBD = inflammatory bowel disease; NHANES = National Health and Nutrition Examination Survey; NHEFS = NHANES I Epidemiologic Follow-up Study; NR = not reported; NSAID = nonsteroidal anti-inflammatory drug; RCT = randomized, controlled trial; U.S. = United States.
